# Supplementary material
Source: publisher site journal article supplement (https://www.dovepress.com/article/407454)
Supplement: Supplementary file 1 [file get_supplementary_file.php]

**Supplementary Table 1**

**Description of the characteristics of subjects with ScvO2 ≥60% and ScvO2** <**60% before surgery.**

| **Variable** | **EXPOSED** | | **UNEXPOSED** | | **Total** | | **p Value** |
| --- | --- | --- | --- | --- | --- | --- | --- |
| ScvO2 <60% n=103 | | ScvO2 ≥60% n=412 | | n=515 | |
| **n (%)** | | **n (%)** | | **n (%)** | |
| **Age (years):** |  |  |  |  |  |  |  |
| <55 | 10 | 9.7% | 61 | 14.8% | 71 | 13.8% | 0.010 |
| 55 - 64 | 28 | 27.2% | 107 | 26.0% | 135 | 26.2% |
| 65 - 74 | 31 | 30.1% | 166 | 40.3% | 197 | 38.3% |
| ≥75 | 34 | 33.0% | 78 | 18.9% | 112 | 21.7% |
| Average ± SD | 68.34 ± 10.66 | | 66.03 ± 9.104 | | 66.49 ± 9.47 | | 0.019 |
| **BMI (kg/m²):** |  |  |  |  |  |  |  |
| <25 | 61 | 59.2% | 230 | 55.8% | 291 | 56.5% | 0.125 |
| 25 - 29 | 35 | 34.0% | 128 | 31.1% | 163 | 31.7% |
| 30 - 34 | 4 | 3.9% | 47 | 11.4% | 51 | 9.9% |
| ≥35 | 3 | 2.9% | 7 | 1.7% | 10 | 1.9% |
| Average ± SD | 25.47 ± 3.223 | | 25.9 ± 3.68 | | 25.81 ± 3.59 | | 0.316 |
| **Body surface (m²)** |  |  |  |  |  |  |  |
| <1.5 | 10 | 9.7% | 34 | 8.3% | 44 | 9% | 0.334 |
| 1.5 - 1.74 | 78 | 75.7% | 337 | 81.8% | 415 | 81% |
| 1.75 - 1.99 | 15 | 14.6% | 41 | 10.0% | 56 | 11% |
| ≥2.0 |  |  |  |  |  |  |
| Average ± SD | 1.644 ± 0.08837 | | 1.637 ± 0.08785 | | 69.4 ± 11.8 | | 0.579 |
| **Sex:** |  |  |  |  |  |  |  |
| Female | 28 | 27.2% | 120 | 29.1% | 148 | 28.7% | 0.807 |
| Male | 75 | 72.8% | 292 | 70.9% | 367 | 71.3% |  |
| **SE stratum:** |  |  |  |  |  |  |  |
| High | 8 | 7.8% | 34 | 8.3% | 42 | 8.2% |  |
| Medium | 61 | 59.2% | 278 | 67.5% | 339 | 65.8% | 0.192 |
| Low | 34 | 33.0% | 100 | 24.3% | 134 | 26.0% |  |
| **Smoker:** |  |  |  |  |  |  |  |
| Yes* | 4 | 3.9% | 42 | 10.2% | 46 | 8.9% | 0.052 |
| No | 99 | 96.1% | 370 | 89.8% | 469 | 91.1% |  |
| **Diabetes Mellitus:** |  |  |  |  |  |  |  |
| Yes | 37 | 35.9% | 159 | 38.6% | 196 | 38.1% | 0.617 |
| No | 66 | 64.1% | 253 | 61.4% | 319 | 61.9% |  |
| **Dyslipidemia:** |  |  |  |  |  |  |  |
| Yes | 60 | 58.3% | 246 | 59.7% | 306 | 59.4% | 0.240 |
| No | 19 | 18.4% | 96 | 23.3% | 115 | 22.3% |  |
| No reply | 24 | 23.3% | 70 | 17.0% | 94 | 18.3% |  |
| **Heart failure:** |  |  |  |  |  |  |  |
| Yes | 33 | 32.0% | 115 | 27.9% | 148 | 28.7% | 0.465 |
| No | 70 | 68.0% | 297 | 72.1% | 367 | 71.3% |  |
| **LVEF:** |  |  |  |  |  |  |  |
| ≥35% | 2 | 1.9% | 22 | 5.3% | 24 | 4.7% | 0.143 |
| <35% | 101 | 98.1% | 390 | 94.7% | 491 | 95.3% |  |
| Average ± SD | 52.24 ± 10.66% | | 50.91 ± 10.16 | | 51.20 ± 10.70 | | 0.279 |
| **COPD:** |  |  |  |  |  |  |  |
| Yes | 20 | 19.4% | 53 | 12.9% | 73 | 14.2% | 0.113 |
| No | 83 | 80.6% | 356 | 86.4% | 439 | 85.2% |  |
| No reply | 0 | 0.0% | 3 | 0.7% | 3 | 0.6% |  |
| **Sepsis:** |  |  |  |  |  |  |  |
| Yes | 26 | 25.2% | 62 | 15.0% | 88 | 17.1% | 0.018 |
| No | 77 | 74.8% | 350 | 85.0% | 427 | 82.9% |  |
| **CKD:** |  |  |  |  |  |  |  |
| No | 86 | 83.5% | 379 | 92.0% | 465 | 90.3% |  |
| No dialysis | 9 | 8.7% | 22 | 5.3% | 31 | 6.0% | 0.017 |
| Dialysis | 8 | 7.8% | 11 | 2.7% | 19 | 3.7% |  |
| **Kidney function:** |  |  |  |  |  |  |  |
| Creatinine <2.3 mg/dL | 94 | 91.3% | 397 | 96.4% | 491 | 95.3% | 0.036 |
| Creatinine ≥2.3 mg/dL | 9 | 8.7% | 15 | 3.6% | 24 | 4.7% |  |
| Average ± SD | 1.332 ± 1.023 | | 1.141 ± 0.8631 | | 1.18 ± 0.90 | | 0.022 |
| **Peripheral vascular disease:** |  |  |  |  |  |  |  |
| Yes | 17 | 16.5% | 36 | 8.7% | 53 | 10.3% |  |
| No | 76 | 73.8% | 350 | 85.0% | 426 | 82.7% | 0.024 |
| No reply | 10 | 9.7% | 26 | 6.3% | 36 | 7.0% |  |
| **Pulmonary hypertension:** |  |  |  |  |  |  |  |
| No | 89 | 86.4% | 349 | 84.7% | 438 | 85.0% |  |
| Mild-moderate | 10 | 9.7% | 54 | 13.1% | 64 | 12.4% | 0.616 |
| Severe | 4 | 3.9% | 9 | 2.2% | 13 | 2.5% |  |
| **Cerebrovascular accident:** |  |  |  |  |  |  |  |
| Yes | 4 | 3.9% | 18 | 4.4% | 22 | 4.3% | 0.999 |
| No | 99 | 96.1% | 394 | 95.6% | 493 | 95.7% |  |
| **Arrhythmia:** |  |  |  |  |  |  |  |
| Yes | 12 | 11.7% | 24 | 5.8% | 36 | 7.0% | 0.050 |
| No | 91 | 88.3% | 388 | 94.2% | 479 | 93.0% |  |
| **Type of arrhythmia:** |  |  |  |  |  |  |  |
| Yes | 12 | 11.7% | 24 | 5.8% | 36 | 7.0% | 0.775 |
| No | 91 | 88.3% | 388 | 94.2% | 479 | 93.0% |  |
| **AMI:** |  |  |  |  |  |  |  |
| No | 54 | 52.4% | 220 | 53.4% | 274 | 53.2% |  |
| >21 days | 19 | 18.4% | 71 | 17.2% | 90 | 17.5% | 0.775 |
| 8 - 21 days | 19 | 18.4% | 88 | 21.4% | 107 | 20.8% |  |
| ≤7 days | 10 | 9.7% | 32 | 7.8% | 42 | 8.2% |  |
| **Prior percutaneous**  **intervention:** |  |  |  |  |  |  |  |
| Yes | 79 | 76.7% | 325 | 78.9% | 404 | 78.4% |  |
| No | 22 | 21.4% | 87 | 21.1% | 109 | 21.2% | 0.883 |
| No reply | 2 | 1.9% | 0 | 0.0% | 2 | 0.4% |  |
| **IABP use:** |  |  |  |  |  |  |  |
| Yes | 5 | 4.9% | 3 | 0.7% | 8 | 1.6% | <0.001 |
| No | 98 | 95.1% | 409 | 99.3% | 507 | 98.4% |  |
| **Angina:** |  |  |  |  |  |  |  |
| No | 61 | 59.2% | 163 | 39.6% | 224 | 43.5% | <0.001 |
| Yes | 42 | 40.8% | 249 | 60.4% | 291 | 56.5% |  |
| **Hospital stay:** |  |  |  |  |  |  |  |
| ≤7 days | 92 | 89.3% | 361 | 87.6% | 453 | 88.0% |  |
| 8 - 14 days | 1 | 1.0% | 20 | 4.9% | 21 | 4.1% | 0.167 |
| ≥15 days | 10 | 9.7% | 31 | 7.5% | 41 | 8.0% |  |
| Average ± SD | 2.961 ± 3.478 | | 4.323 ± 3.841 | | 4.05 ± 3.8 | |  |
| **Number of injured vessels:** |  |  |  |  |  |  |  |
| 1 vessel | 8 | 7.8% | 21 | 5.1% | 29 | 5.6% |  |
| 2 vessels | 17 | 16.5% | 68 | 16.5% | 85 | 16.5% | 0.571 |
| ≥3 vessels | 78 | 75.7% | 323 | 78.4% | 401 | 77.9% |  |
| **Left coronary trunk**  **injury:** |  |  |  |  |  |  |  |
| Yes | 35 | 34.0% | 78 | 18.9% | 113 | 21.9% | <0.001 |
| No | 68 | 66.0% | 334 | 81.1% | 402 | 78.1% |  |
| **Hemoglobin:** |  |  |  |  |  |  |  |
| ≥12 g/dL | 36 | 35.0% | 102 | 24.8% | 138 | 26.8% | <0.001 |
| <12 g/dL | 67 | 65.0% | 310 | 75.2% | 377 | 73.2% |  |
| Average ± SD | 12.69 ± 2.018 | | 13.06 ± 1.712 | | 12.9 ± 1.8 | | <0.001 |
| **Blood transfusion:**** |  |  |  |  |  |  |  |
| Yes | 7 | 6.8% | 13 | 3.2% | 20 | 3.9% | <0.001 |
| No | 96 | 93.2% | 399 | 96.8% | 495 | 96.1% |  |
| **Type of surgery:** |  |  |  |  |  |  |  |
| Elective | 0 | 0.0% | 2 | 0.5% | 2 | 0.4% |  |
| Urgent/emergent | 103 | 100.0% | 410 | 99.5% | 513 | 99.6% |  |
| **Vasodilator use:** |  |  |  |  |  |  |  |
| Yes | 30 | 29.1% | 87 | 21.1% | 117 | 22.7% | <0.001 |
| No | 73 | 70.9% | 325 | 78.9% | 398 | 77.3% |  |
| **Ventilatory support:** |  |  |  |  |  |  |  |
| No | 10 | 9.7% | 12 | 2.9% | 22 | 4.3% | 0.005 |
| Yes | 93 | 90.3% | 400 | 97.1% | 493 | 95.7% |  |
| **Valvular insufficiency:** |  |  |  |  |  |  |  |
| Aortic valve |  |  |  |  |  |  |  |
| Mild | 11 | 84.6% | 35 | 8.5% | 46 | 8.9% | 0.690 |
| Moderate | 2 | 15.4% | 12 | 2.9% | 14 | 2.7% |  |
| Tricuspid valve |  |  |  |  |  |  |  |
| Mild | 8 | 7.8% | 47 | 11.4% | 55 | 10.7% | 0.312 |
| Moderate | 2 | 1.9% | 3 | 0.7% | 5 | 1.0% |  |
| Severe |  |  |  |  |  |  |  |
| Mitral valve |  |  |  |  |  |  |  |
| Mild | 28 | 27.2% | 115 | 27.9% | 143 | 27.8% | 0.540 |
| Moderate | 10 | 9.7% | 25 | 6.1% | 35 | 6.8% |  |
| Severe | 0 | 0.0% | 2 | 0.5% | 2 | 0.4% |  |

**Note:** Data is presented as frequencies, averages with standard deviation (SD)and percentages. ***** Currently smokes or used to smoke. ****** Red blood cells, plasma, platelets, or cryoprecipitate.

**Abbreviations:** AMI: Acute myocardial infarction; BMI: Body mass index; COPD: Chronic obstructive pulmonary disease; IABP: Intra-aortic balloon pump; LVEF: Left ventricle ejection fraction; SE: socioeconomic.

**Supplementary Table 2**

**Description of the transurgical characteristics of subjects with ScvO2 ≥60% and ScvO2** <**60%.**

| **Variable** | **EXPOSED** | | **UNEXPOSED** | | **Total** | | **p Value** |
| --- | --- | --- | --- | --- | --- | --- | --- |
| ScvO2 <60% n=103 | | ScvO2 ≥60% n=412 | | n=515 | |
| **n (%)** | | **n (%)** | | **n (%)** | |
| **No. of revascularized vessels:** |  |  |  |  |  |  |  |
| <3 vessels | 17 | 16.5% | 72 | 17.5% | 89 | 17.3% | 0.884 |
| ≥3 vessels | 86 | 83.5% | 340 | 82.5% | 426 | 82.7% |  |
| **Extracorporeal circulation:** |  |  |  |  |  |  |  |
| Yes | 100 | 97.1% | 403 | 97.8% | 503 | 97.7% | 0.713 |
| No | 3 | 2.9% | 9 | 2.2% | 12 | 2.3% |  |
| **Pump time:** |  |  |  |  |  |  |  |
| ≤90 minutes | 98 | 95.1% | 403 | 97.8% | 501 | 97.3% | 0.249 |
| >90 minutes | 5 | 4.9% | 9 | 2.2% | 14 | 2.7% |  |
| Average ± SD | 3.54 ± 4.99 | | 2.17 ± 3.65 | | 72.1 ±23.0 | | <0.001 |
| **Ischemia time:** |  |  |  |  |  |  |  |
| <60 minutes | 82 | 79.6% | 368 | 89.3% | 450 | 87.4% | 0.012 |
| ≥60 minutes | 21 | 20.4% | 44 | 10.7% | 65 | 12.6% |  |
| Average ± SD | 47.90 ± 16.53 | | 44.29 ± 13.98 | | 45.01 ± 14.58 | | 0.040 |
| **Blood transfusion*:** |  |  |  |  |  |  |  |
| Yes | 7 | 6.8% | 13 | 3.2% | 20 | 3.9% | 0.093 |
| No | 96 | 93.2% | 399 | 96.8% | 495 | 96.1% |  |
| **Type of blood product:** |  |  |  |  |  |  |  |
| Red blood cells |  |  |  |  |  |  |  |
| ≤3 units | 87 | 84.5% | 412 | 100.0% | 499 | 96.9% | <0.001 |
| <3 units | 16 | 15.5% | 0 | 0.0% | 16 | 3.1% |  |
| Plasma |  |  |  |  |  |  |  |
| ≤2 units | 78 | 75.7% | 412 | 100.0% | 490 | 95.1% | <0.001 |
| <2 units | 25 | 24.3% | 0 | 0.0% | 25 | 4.9% |  |
| Platelets |  |  |  |  |  |  |  |
| ≤6 units | 89 | 86.4% | 412 | 100.0% | 501 | 97.3% | <0.001 |
| <6 units | 14 | 13.6% | 0 | 0.0% | 14 | 2.7% |  |
| **IABP use:** |  |  |  |  |  |  |  |
| Yes | 18 | 17.5% | 19 | 4.6% | 37 | 7.2% | <0.001 |
| No | 85 | 82.5% | 393 | 95.4% | 478 | 92.8% |  |
| **Cardiogenic shock:** |  |  |  |  |  |  |  |
| Yes | 19 | 18.4% | 9 | 2.2% | 28 | 5.4% | <0.001 |
| No | 84 | 81.6% | 403 | 97.8% | 487 | 94.6% |  |
| **Arrhythmia:** |  |  |  |  |  |  |  |
| Yes | 7 | 6.8% | 19 | 4.6% | 26 | 5.0% | 0.448 |
| No | 96 | 93.2% | 393 | 95.4% | 489 | 95.0% |  |
| **Type of arrhythmia:** |  |  |  |  |  |  |  |
| Auricular fibrillation | 102 | 99.0% | 409 | 99.3% | 511 | 99.2% | 0.999 |
| Supraventricular tachycardia | 102 | 99.0% | 410 | 99.5% | 512 | 99.4% | 0.488 |
| Ventricular tachycardia | 101 | 98.1% | 407 | 98.8% | 508 | 98.6% | 0.631 |
| Ventricular fibrillation | 98 | 95.1% | 403 | 97.8% | 501 | 97.3% | 0.168 |
| **Use of pressor agents:** |  |  |  |  |  |  |  |
| No | 35 | 34.0% | 94 | 22.8% | 129 | 25.0% | 0.027 |
| Yes | 68 | 66.0% | 318 | 77.2% | 386 | 75.0% |  |
| **Inotrope use:** |  |  |  |  |  |  |  |
| No | 59 | 57.3% | 212 | 51.5% | 271 | 52.6% | 0.342 |
| Yes | 44 | 42.7% | 200 | 48.5% | 244 | 47.4% |  |
| **Vasodilator use:** |  |  |  |  |  |  |  |
| No | 35 | 34.0% | 133 | 32.3% | 168 | 32.6% | 0.832 |
| Yes | 68 | 66.0% | 279 | 67.7% | 347 | 67.4% |  |

**Note:** Data is presented as frequencies, averages with standard deviation (SD)and percentages. ***** Red blood cells, plasma, platelets, or cryoprecipitate.

**Abbreviations:** IABP: Intra-aortic balloon pump.

**Supplementary Table 3**

**Description of the postsurgical characteristics of subjects with SvO2 ≥60% and SvO2 <60%.**

| **Variable** | **EXPOSED** | | **UNEXPOSED** | | **Total** | | **p Value** | **RR** | **95% CI** | **p Value** |
| --- | --- | --- | --- | --- | --- | --- | --- | --- | --- | --- |
| ScvO2 <60% n=103 | | ScvO2 ≥60% n=412 | | n=515 | |
| **n (%)** | | **n (%)** | | **n (%)** | |
| **ICU stay:** |  |  |  |  |  |  |  |  |  |  |
| >2 days | 35 | 34.0% | 53 | 12.9% | 88 | 17.1% | <0.001 | 2.64 | 1.82-3.81 | <0.001 |
| ≤2 days | 68 | 66.0% | 359 | 87.1% | 427 | 82.9% |  |  |  |  |
| **Hospital stay:** |  |  |  |  |  |  |  |  |  |  |
| Admitted to the hospital | 40 | 38.8% | 22 | 5.3% | 62 | 12.0% | <0.001 | 4.63 | 3.49 - 5.45 | <0.001 |
| Not admitted to the hospital | 63 | 61.2% | 390 | 94.7% | 453 | 88.0% |  |  |  |  |
| **Blood transfusion*:** |  |  |  |  |  |  |  |  |  |  |
| Yes | 56 | 54.4% | 138 | 33.5% | 194 | 37.7% | <0.001 | 1.97 | 1.39 - 2.77 | <0.001 |
| No | 47 | 45.6% | 274 | 66.5% | 321 | 62.3% |  |  |  |  |
| **Type of blood product:** |  |  |  |  |  |  |  |  |  |  |
| Red blood cells |  |  |  |  |  |  |  |  |  |  |
| ≤3 units | 83 | 80.6% | 411 | 99.8% | 494 | 95.9% | <0.001 | 5.66 | 4.36 – 7.00 | <0.001 |
| >3 units | 20 | 19.4% | 1 | 0.2% | 21 | 4.1% |  |  |  |  |
| Plasma |  |  |  |  |  |  |  |  |  |  |
| ≤2 units | 82 | 79.6% | 412 | 100.0% | 494 | 95.9% | <0.001 |  |  |  |
| >2 units | 21 | 20.4% | 0 | 0.0% | 21 | 4.1% |  |  |  |  |
| Platelets |  |  |  |  |  |  |  |  |  |  |
| ≤6 units | 99 | 96.1% | 412 | 100.0% | 511 | 99.2% | <0.001 |  |  |  |
| >6 units | 4 | 3.9% | 0 | 0.0% | 4 | 0.8% |  |  |  |  |
| Cryoprecipitate |  |  |  |  |  |  |  |  |  |  |
| <10 units | 102 | 99.0% | 412 | 100.0% | 514 | 99.8% | <0.001 |  |  |  |
| ≥10 units | 1 | 1.0% | 0 | 0.0% | 1 | 0.2% |  |  |  |  |
| **Use of pressor agents:** |  |  |  |  |  |  |  |  |  |  |
| Yes | 66 | 64.1% | 116 | 28.2% | 182 | 35.3% | <0.001 | 3.26 | 2.28 – 4.67 | <0.001 |
| No | 37 | 35.9% | 296 | 71.8% | 333 | 64.7% |  |  |  |  |
| **Inotrope use:** |  |  |  |  |  |  |  |  |  |  |
| Yes | 86 | 83.5% | 242 | 58.7% | 328 | 63.7% | <0.001 | 2.88 | 1.79 – 4.70 | <0.001 |
| No | 17 | 16.5% | 170 | 41.3% | 187 | 36.3% |  |  |  |  |
| **Vasodilator use:** |  |  |  |  |  |  |  |  |  |  |
| Yes | 39 | 37.9% | 194 | 47.1% | 233 | 45.2% | 0.092 | 0.73 | 0.51 – 1.05 | 0.058 |
| No | 64 | 62.1% | 218 | 52.9% | 282 | 54.8% |  |  |  |  |
| **IABP use:** |  |  |  |  |  |  |  |  |  |  |
| Yes | 18 | 17.5% | 21 | 5.1% | 39 | 7.6% | <0.001 | 2.58 | 1.69 – 3.68 | <0.001 |
| No | 85 | 82.5% | 391 | 94.9% | 476 | 92.4% |  |  |  |  |
| **Cardiogenic shock:** |  |  |  |  |  |  |  |  |  |  |
| Yes | 41 | 39.8% | 33 | 8.0% | 74 | 14.4% | <0.001 | 3.94 | 2.86 – 5.31 | <0.001 |
| No | 62 | 60.2% | 379 | 92.0% | 441 | 85.6% |  |  |  |  |
| **Arrhythmia:** |  |  |  |  |  |  |  |  |  |  |
| Yes | 33 | 32.0% | 76 | 18.4% | 109 | 21.2% | 0.004 | 1.75 | 1.22 – 2.47 | 0.002 |
| No | 70 | 68.0% | 336 | 81.6% | 406 | 78.8% |  |  |  |  |
| **Type of arrhythmia:** |  |  |  |  |  |  |  |  |  |  |
| Auricular fibrillation | 30 | 29.1% | 57 | 13.8% | 87 | 16.9% | 0.006 | 2.02 | 1.39 – 2.85 | 0.003 |
| Supraventricular tachycardia | 3 | 2.9% | 9 | 2.2% | 12 | 2.3% | 0.713 | 1.25 | 0.44 – 2.75 | 0.442 |
| Ventricular tachycardia | 1 | 1.0% | 2 | 0.5% | 3 | 0.6% | 0.488 | 1.67 | 0.30 – 4.12 | 0.488 |
| Ventricular fibrillation | 3 | 2.9% | 0 | 0.0% | 3 | 0.6% | 0.006 | - | - | - |

**Note:** Data is presented as frequencies, averages with standard deviation (SD)and percentages. ***** Red blood cells, plasma, platelets, or cryoprecipitate.

**Abbreviations:** IABP: Intra-aortic balloon pump; RR: Relative Risk.

**Supplementary Table 4**

**Mortality days and causes in subjects with ScvO2 ≥60%.**

| **Day and cause of death** | | | | | | | |
| --- | --- | --- | --- | --- | --- | --- | --- |
| **Day of death** | **N** | **%** | **Cause of death** | **n** | **%** | **Average ± SD** | **Median** |
| ≤2 days | 22 | 34.4% | Sepsis | 16 | 25.0% | 20.31 ± 9.90 | 23.5 |
| >2 days | 42 | 65.6% | Bleeding | 11 | 17.2% | 2.45 ± 3.53 | 1.0 |
| Average 6.82 ± 9.51 | | | Cardiogenic shock | 35 | 54.7% | 1.97 ± 2.14 | 1.0 |
| Median 2 days | | | AMI | 2 | 3.1% | 8.0 ± 1.41 | 8.0 |

**Note:** Data is presented as frequencies, averages with standard deviation (SD)and percentages.

**Abbreviations:** AMI: Acute myocardial infarction.
